# Supplementary material for: Combined Efficacy of Cinnamomum Zeylanicum And Doxorubicin Against Leukemia Through Regulation of TRAIL And NF-Kappa B Pathways In Rat Model
Source: Research Square preprint supplement (doi:10.21203/rs.3.rs-478779/v1), 2021-05-07
Supplement: Supplementary file 1 [file fa9296e0cd3f85d69cd0b984.docx]

**Supplementary Table 1: Numeric results of all parameters**

|  | **Control** | | | **Benzene** | | | **Doxorubicin** | | | **Cinnamon** | | | **Cinnamon + Doxorubicin** | | |
| --- | --- | --- | --- | --- | --- | --- | --- | --- | --- | --- | --- | --- | --- | --- | --- |
| **Parameters** | **Mean** | **SEM** | **SD** | **Mean** | **SEM** | **SD** | **Mean** | **SEM** | **SD** | **Mean** | **SEM** | **SD** | **Mean** | **SEM** | **SD** |
| **Weight of Liver (g)** | **6.367** | 0.4532 | 0.785 | 9.42 | 0.585 | 1.013 | **5.95** | 0.5826 | 1.009 | **6.718** | 0.5556 | 0.9622 | **5.719** | 0.6857 | 1.188 |
| **Weight of Heart (g)** | **0.73** | 0.06351 | 0.11 | **1.27** | 0.06083 | 0.1054 | **0.776** | 0.03383 | 0.05859 | **0.971** | 0.03874 | 0.0671 | **0.971** | 0.03874 | 0.0671 |
| **Weight of Kidney (g)** | **0.8263** | 0.08858 | 0.1534 | **1.317** | 0.0864 | 0.1498 | **0.9643** | 0.116 | 0.201 | **0.808** | 0.04636 | 0.08029 | **0.8143** | 0.0245 | 0.04244 |
| **WBCs (Count 10^6/ul)** | **7.33** | 0.2485 | 0.4303 | **13.3** | 0.3427 | 0.5935 | **14.74** | 0.7522 | 1.303 | **16.01** | 0.1753 | 0.3037 | **10.94** | 0.309 | 0.5353 |
| **RBCs (Count 10^6/ul)** | **5.667** | 0.3283 | 0.5686 | **2.333** | 0.318 | 0.5508 | **7.227** | 0.3674 | 0.6363 | **6.977** | 0.3056 | 0.5294 | **6.18** | 0.2829 | 0.49 |
| **Platelets (count/uL)** | **1486** | 54.95 | 95.17 | **644.7** | 30.05 | 52.05 | **1592** | 32.19 | 55.75 | **1444** | 148.8 | 257.8 | **1536** | 32.32 | 55.97 |
| **Hemoglobin (g/dl)** | **16.6** | 0.6351 | 1.1 | **14.13** | 0.3283 | 0.5686 | **13.8** | 0.5508 | 0.9539 | **13.83** | 0.2333 | 0.4041 | **12.11** | 0.585 | 1.013 |
| **Lymphocytes (%)** | **61.02** | 1.912 | 3.312 | **55.08** | 0.3889 | 0.6735 | **60.77** | 0.5457 | 0.9452 | **49.5** | 1.57 | 2.718 | **59.25** | 0.2843 | 0.4924 |
| **Neutrophils (%)** | **26.37** | 0.2186 | 0.3786 | **32.32** | 0.7038 | 1.219 | **30.87** | 0.4631 | 0.8021 | **40.03** | 0.7753 | 1.343 | **31.67** | 0.5239 | 0.9074 |
| **Monocytes (%)** | **5.73** | 0.165 | 0.2858 | **8.71** | 0.1626 | 0.2816 | **6.41** | 0.8504 | 1.473 | **6.933** | 0.7535 | 1.305 | **6.13** | 0.2055 | 0.3559 |
| **Eosinophils (%)** | **1.657** | 0.3223 | 0.5582 | **3.857** | 0.3176 | 0.5501 | **2.053** | 0.1919 | 0.3325 | **2.12** | 0.22 | 0.3811 | **2.307** | 0.1683 | 0.2914 |
| **ALT (U/L)** | **53.33** | 2.906 | 5.033 | **79.33** | 2.404 | 4.163 | **49.33** | 3.18 | 5.508 | **52.67** | 2.906 | 5.033 | **35** | 7.371 | 12.77 |
| **ALP (U/L)** | **287** | 4.041 | 7.371 | **129.7** | 8.511 | 14.74 | **246** | 9.815 | 17 | **207.3** | 17.33 | 30.02 | **119.7** | 3.283 | 5.686 |
| **AST (U/L)** | **216.3** | 10.53 | 18.23 | **404** | 8.083 | 14 | **197** | 9.815 | 17 | **155.3** | 9.939 | 17.21 | **91** | 11.72 | 20.3 |
| **STMN1a** | **1** | - | - | **20.74** | 1.378 | 2.387 | **8.752** | 0.7346 | 1.272 | **18.18** | 0.4535 | 0.7856 | **3.267** | 1.155 | 2 |
| **P53 a** | **1** | - | - | **0.3458** | 0.07179 | 0.1243 | **0.02357** | 0.01536 | 0.0266 | **0.9407** | 0.07329 | 0.1269 | **0.03333** | 0.02334 | 0.04043 |
| **GAPDH a** | **1** | - | - | **5.177** | 0.2803 | 0.4855 | **0.3305** | 0.1139 | 0.1974 | **0.9725** | 0.1202 | 0.2081 | **0.3004** | 0.1502 | 0.2602 |
| **Rel-A a** | **1** | - | - | **35.68** | 2.96 | 5.127 | **77.98** | 4.084 | 7.073 | **2.53** | 1.265 | 2.191 | **9.237** | 1.206 | 2.09 |
| **Rel-B a** | **1** | - | - | **3.716** | 0.5019 | 0.8693 | **0.5136** | 0.287 | 0.4971 | **1.831** | 0.5209 | 0.9022 | **0.7218** | 0.3447 | 0.5971 |
| **DR5 a** | **1** | - | - | **1.136** | 0.5289 | 0.9162 | **2.236** | 0.5774 | 1 | **4.573** | 0.5831 | 1.01 | **2.294** | 0.5843 | 1.012 |
| **TRAIL L a** | **1** | - | - | **5.648** | 0.2029 | 0.3514 | **1.421** | 0.2056 | 0.3561 | **2.667** | 0.2188 | 0.379 | **1.399** | 0.3463 | 0.5998 |
| **cFLIP a** | **1** | - | - | **2.223** | 0.179 | 0.3101 | **1.81** | 0.4246 | 0.7355 | **0.8113** | 0.07507 | 0.13 | **0.1853** | 0.08342 | 0.1445 |
| **cas8 a** | **1** | - | - | **4.607** | 0.3076 | 0.5328 | **6.101** | 0.208 | 0.3603 | **2.489** | 0.2801 | 0.4851 | **6.339** | 0.237 | 0.4104 |
| **a**Relative gene expression | | | | | | | | | | | | | | | |
